# Supplementary material for: Disease-associated mutations of claudin-19 disrupt retinal neurogenesis and visual function
Source: PubMed Central journal article supplement (PMC6433901; doi:10.1038/s42003-019-0355-0), 2019-03-25
Supplement: 42003_2019_355_MOESM2_ESM.pdf [file 42003_2019_355_MOESM2_ESM.pdf]

## Supplementary Figures

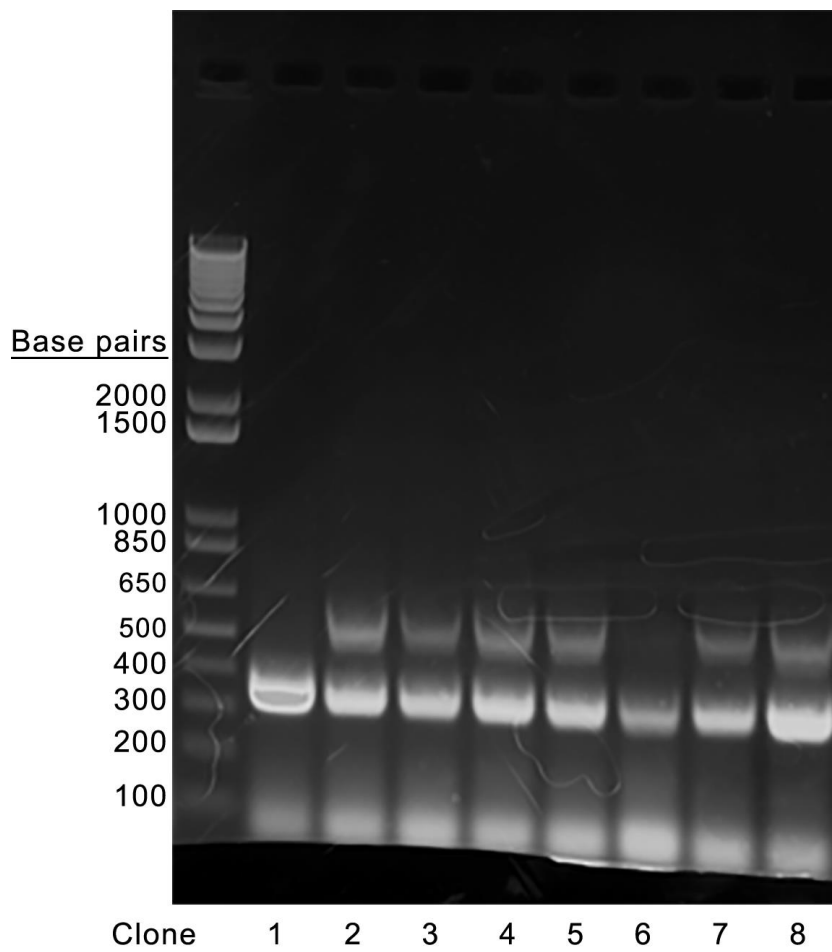

Supplementary Figure 1. Uncropped gel for Figure 1B. Standards at the left are 1 Kb plus DNA ladder, Invitrogen.

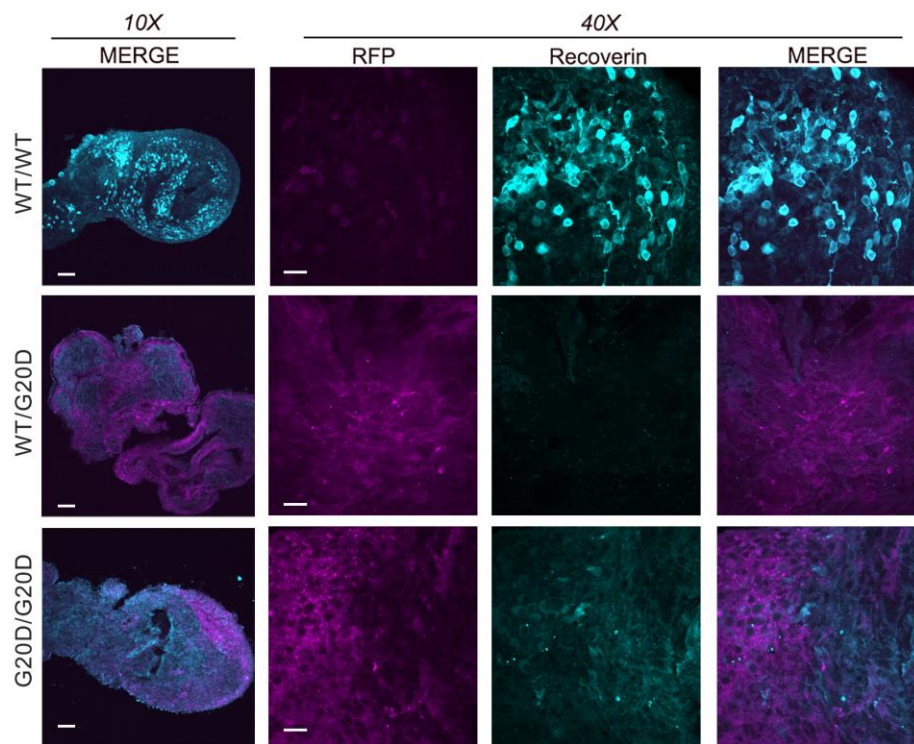

Supplementary Figure 2. Retinal cups derived from CLDN19<sup>WT/G20D</sup> or CLDN19<sup>G20D/G20D</sup> hiPSC failed to express the photoreceptor marker, recoverin. On DD80, retinal cups were immunostained to reveal the expression of recoverin. RFP-puromycin revealed transduced hiPSC. Low power views in the left column were acquired with a 10x objective to demonstrate retinal cups for CLDN19<sup>WT/WT</sup> and CLDN19<sup>WT/G20D</sup> cultures, but non-descript structures for CLDN19<sup>G20D/G20D</sup>. High power views were acquired with a 40x-oil objective to demonstrate the presence of recoverin in CLDN19<sup>WT/WT</sup>, but not CLDN19<sup>WT/G20D</sup> or CLDN19<sup>G20D/G20D</sup> cultures. Scale Bars: 10× panels, 40 μm; 40× panels, 20μm

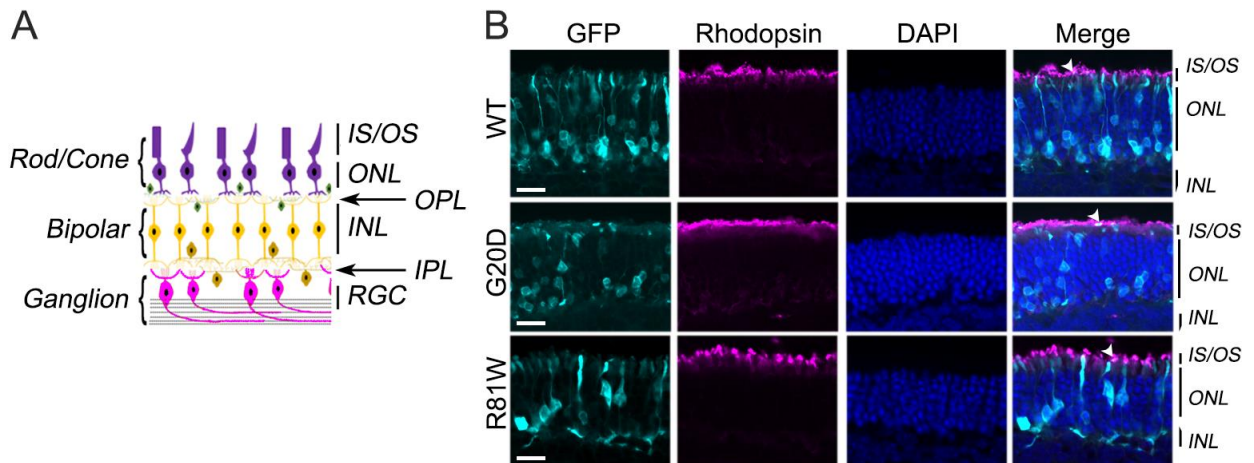

Supplementary Figure 3. Expression of CLDN19 or its mutants did not affect the formation of photoreceptor inner and outer segments. Mice were injected on PN0 and eyes harvested on PN30. Antibodies to Rhodopsin reveal the distribution of un-transduced and transduced photoreceptors. A) Schema of the retina. B) GFP (cyan) marks transduced cells. The white signal in the merged images (arrowheads) indicates the co-localization of rhodopsin and GFP. IS, photoreceptor inner segment; OS, photoreceptor outer segment; ONL, outer nuclear layer; OPL, outer plexiform layer; INL, inner nuclear layer; IPL, inner plexiform layer; RGC, retinal ganglion cell layer; Rhodopsin, magenta; DAPI, Blue; Scale bar, 20  $\mu$ m

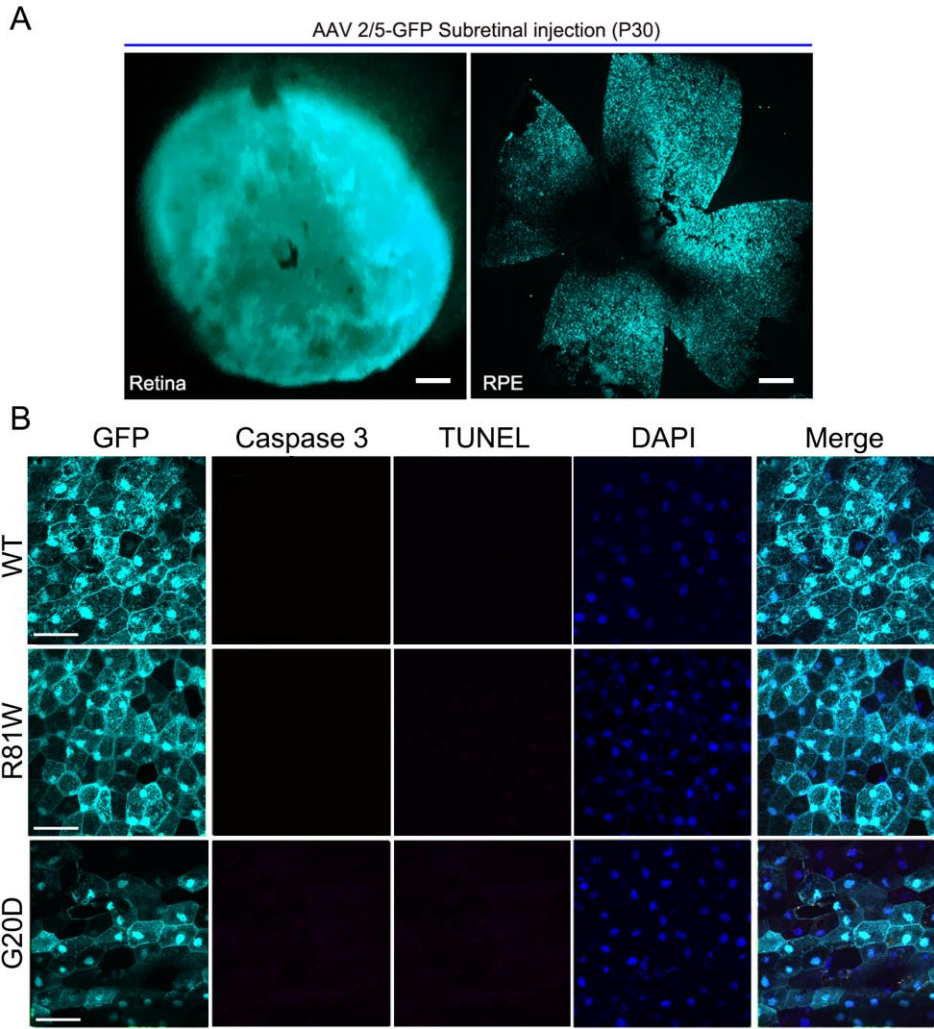

Supplementary Figure 4. Mutated Claudin-19 did not induce cell apoptosis in mouse RPE. GFP indicates cells transduced by the AAV viral vector. Images were obtained on PN30. A) Flat-mount images of the retina and RPE (after the neurosensory retina was removed) indicate the extent of the retina that was infected by the viral vector. Scale Bar 500  $\mu$ m B) In higher power images of the RPE, a fluorescence signal was not observed due to the TUNEL assay or for immunofluorescence labeling of the cleaved form of caspase 3. Scale Bar, 20  $\mu$ m

Supplementary Table 1: Details of Primary antibodies

| Antigen      | Host <sup>1</sup> | Catalogue | Dilution | Supplier                  |
|--------------|-------------------|-----------|----------|---------------------------|
| BRN3         | MM                | sc-390780 | 1:50     | Santa Cruz Biotechnology  |
| Caspase-3    | RP                | 9662      | 1:1000   | Cell Signaling Technology |
| Claudin-19   | MM                | MAB6970   | 10 µg/ml | R&D Systems               |
| FLAG-tag     | MM                | 9A3       | 1:1600   | Cell Signaling Technology |
| HA-tag       | RM                | C29F4     | 1:1600   | Cell Signaling Technology |
| N-Cadherin   | MM                | C3865     | 2 µg/ml  | Sigma Aldrich             |
| OCT4         | RP                | 2890S     | 1:200    | Cell Signaling Technology |
| PKC $\alpha$ | RM                | A302-446A | 1:100    | Abgent                    |
| Recoverin    | RP                | AB5585    | 1:500    | EMD Millipore             |
| Rhodopsin    | MM                | R5403     | 1:400    | Cell Signaling Technology |
| RPE65        | MM                | MAB5428   | 1:400    | EMD Millipore             |
| SSEA4        | MM                | 4744S     | 1:500    | Cell Signaling Technology |
| ZO-1         | RM                | D7D12     | 1:500    | Life Technologies         |

<sup>1</sup>RP, Rabbit Polyclonal; RM, Rabbit Monoclonal; MM, Mouse Monoclonal; MP, Mouse Polyclonal; SP, Sheep Polyclonal; GP, Goat Polyclonal

## Supplementary Methods

### *Imaging Studies*

For all confocal microscopic images, black and white images for each channel were acquired using Zen Software (Zeiss, Thornwood, NY) and false-colored: cyan for GFP/Cy2, magenta for RFP/Cy3, orange for Cy5, and blue for DAPI. White on the images indicates the overlap of the cyan and magenta signals. The same linear adjustments (gamma=1.00) were applied to all images in the same panel using the settings indicated in for each figure below. “White” settings were determined for the brightest sample and applied to all panels in the figure including the control. The settings used for each Figure Panel are included below. Post-processing in Photoshop was confined to expanding levels for the entire image such that all data of the brightest image was included in the range 0-255, and that setting applied for all images in the panel.

### LSM 410 spinning-disc confocal microscope specifications:

Lasers: 405nm, 488nm, 532/561nm, 639nm

| Filter set                         | Item number     | Excitation     | Beam splitter | Emission       |
|------------------------------------|-----------------|----------------|---------------|----------------|
| Filter Set 38 HE (FITC/GFP)        | 489038-9901-000 | BP 470/40 (HE) | FT 495 (HE)   | BP 525/50 (HE) |
| Filter Set 43 HE (dsRED/Rhodamine) | 489043-9901-000 | BP 550/25 (HE) | FT 570 (HE)   | BP 605/70 (HE) |
| Filter Set 49 (DAPI)               | 489049-9901-000 | G 365          | FT 395        | BP 445/50      |
| Filter Set 50 (Cy 5)               | 489050-9901-000 | BP 640/30      | FT660         | BP 690/50      |

### Axiovert 40 CFL inverted microscope filter sets (Omega Optical)

|            | XF404      | XF406      |
|------------|------------|------------|
| Excitation | 450-486 nm | 532-576 nm |
| Emission   | 510-558 nm | 598-645 nm |

### **Figure 1:**

#### Panel D: Zen window settings

| Channel | Black | Gamma | White |
|---------|-------|-------|-------|
| DAPI    | 30    | 1.0   | 1115  |
| Cy2/GFP | 50    | 1.0   | 1436  |
| Cy3/RFP | 30    | 1.0   | 994   |
| Cy5     | 30    | 1.0   | 1280  |

## Figure 2

Panel B. Image acquired with an Iphone mounted on an Axiovert 40 CFL inverted microscope with no post-processing.

Panel C: Zen window settings

| Channel | Black | Gamma | White |
|---------|-------|-------|-------|
| DAPI    | 0     | 1.0   | 1266  |
| Cy2/GFP | 0     | 1.0   | 393   |
| Cy3/RFP | 0     | 1.0   | 1004  |

## Figure 3

Panel A: Zen window settings

| Channel | Black | Gamma | White |
|---------|-------|-------|-------|
| DAPI    | 100   | 1.0   | 4096  |
| Cy3/RFP | 0     | 1.0   | 500   |
| Cy5     | 0     | 1.0   | 1485  |

## Figure 4

Panel B: Image acquired with an Iphone and no post-processing.

## Figure 5

Panel B: Zen window settings

| Channel | Black | Gamma | White |
|---------|-------|-------|-------|
| Cy2/GFP | 47    | 1.0   | 208   |
| Cy3/RFP | 0     | 1.0   | 431   |
| DIC     | 0     | 1.0   | 1708  |

## Figure 6

Panel B: Zen window settings

| Channel | Black | Gamma | White |
|---------|-------|-------|-------|
| DAPI    | 20    | 1.0   | 1565  |
| Cy2/GFP | 20    | 1.0   | 382   |
| Cy3/RFP | 20    | 1.0   | 482   |

Panel C: Zen window settings

| Channel | Black | Gamma | White |
|---------|-------|-------|-------|
| Cy2/GFP | 20    | 1.0   | 621   |
| Cy3/RFP | 20    | 1.0   | 184   |

Panel D: RetiMap confocal scanning laser ophthalmoscope (cSLO) image with no post-processing.

## Figure 7

### Panel B: Zen window settings

| Channel | Black | Gamma | White |
|---------|-------|-------|-------|
| DAPI    | 0     | 1.0   | 2600  |
| Cy2/GFP | 0     | 1.0   | 2908  |
| Cy5     | 0     | 1.0   | 2050  |

### Panel E: Zen window settings

| Channel | Black | Gamma | White |
|---------|-------|-------|-------|
| DAPI    | 0     | 1.0   | 2600  |
| Cy2/GFP | 0     | 1.0   | 761   |
| Cy3/RFP | 0     | 1.0   | 1000  |
| Cy5     | 0     | 1.0   | 1325  |

## Figure 8

### Panel A: Zen window settings:

| Channel | Black | Gamma | White |
|---------|-------|-------|-------|
| Cy2/GFP | 0     | 1.0   | 2375  |
| Cy3/RFP | 0     | 1.0   | 408   |

Panel C: Zen window settings Channels matched to highlight double labeling in the merged image.

### Wild type

| Channel | Black | Gamma | White |
|---------|-------|-------|-------|
| DAPI    | 0     | 1.0   | 1200  |
| Cy2/GFP | 0     | 1.0   | 770   |
| Cy3/RFP | 0     | 1.0   | 584   |

### R81W

| Channel | Black | Gamma | White |
|---------|-------|-------|-------|
| DAPI    | 0     | 1.0   | 1200  |
| Cy2/GFP | 0     | 1.0   | 873   |
| Cy3/RFP | 0     | 1.0   | 889   |

### G20D

| Channel | Black | Gamma | White |
|---------|-------|-------|-------|
| DAPI    | 0     | 1.0   | 1200  |
| Cy2/GFP | 0     | 1.0   | 3530  |
| Cy3/RFP | 0     | 1.0   | 1084  |



### Supplementary Figure 1

Zen window settings: Note that Cy5 is false colored green in this figure  
10X column

| Channel | Black | Gamma | White |
|---------|-------|-------|-------|
| Cy3/RFP | 0     | 1.0   | 547   |
| Cy5     | 0     | 1.0   | 1500  |

40X columns

| Channel | Black | Gamma | White |
|---------|-------|-------|-------|
| Cy3/RFP | 0     | 1.0   | 760   |
| Cy5     | 0     | 1.0   | 3400  |

### Supplementary Figure 2

Zen window settings

| Channel | Black | Gamma | White |
|---------|-------|-------|-------|
| DAPI    | 0     | 1.0   | 3280  |
| Cy2/GFP | 0     | 1.0   | 742   |
| Cy3/RFP | 0     | 1.0   | 2423  |

### Supplementary Figure 3

Panel A: Image acquired with an Iphone and no post-processing.

Panel B: Zen window settings

| Channel | Black | Gamma | White |
|---------|-------|-------|-------|
| DAPI    | 0     | 1.0   | 901   |
| Cy2/GFP | 0     | 1.0   | 2400  |
| Cy3/RFP | 0     | 1.0   | 1800  |
| Cy5     | 0     | 1.0   | 1800  |
